# Supplementary material
Source: Springer Nature journal article supplement (https://www.springermedizin.de/resource/supplementary/12990_2009_305_MOESM6_ESM.pdf/9612992)

**A****COX-2**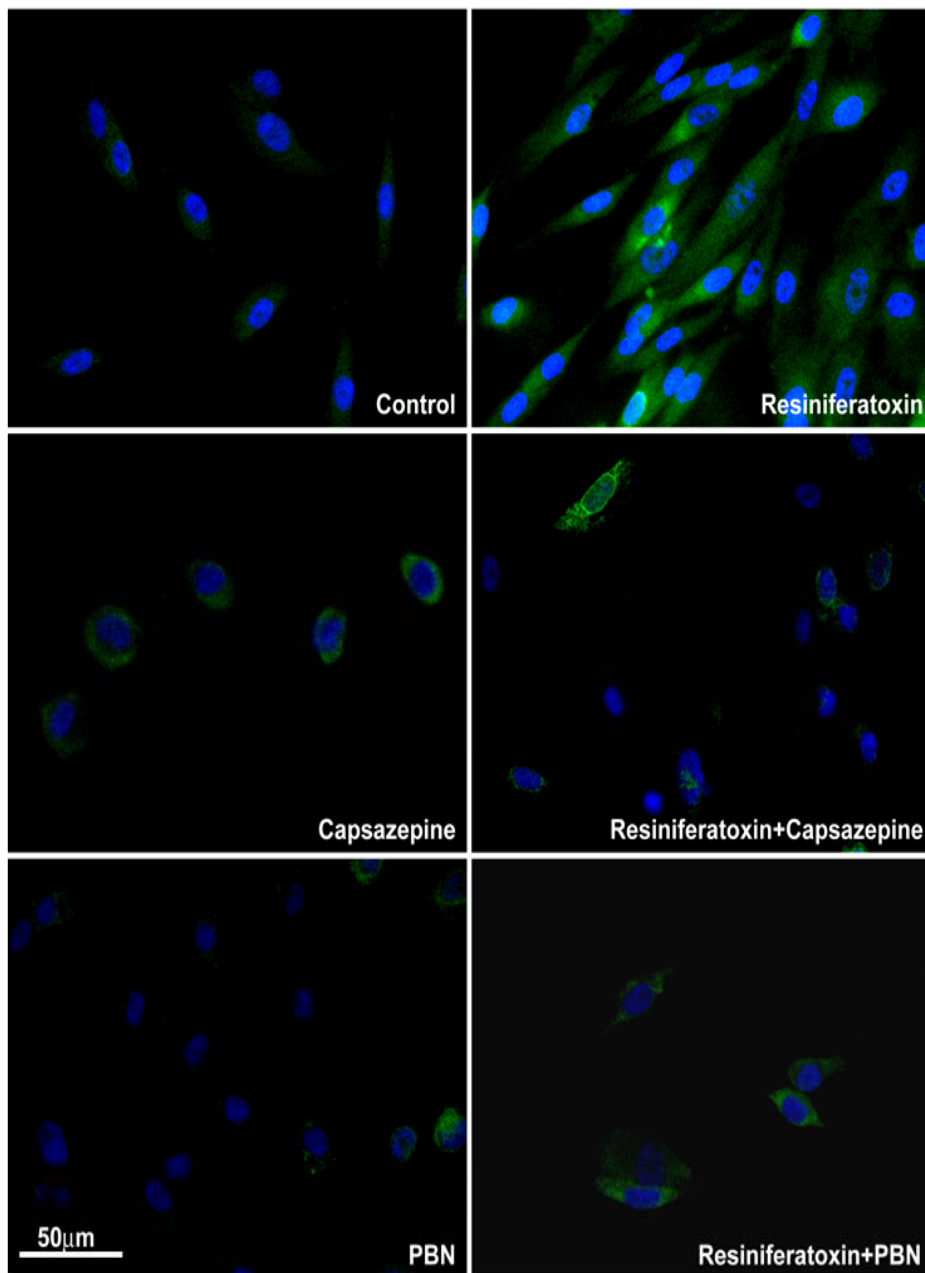**B**

Quantification of TNF $\alpha$  Expression after 100  $\mu$ M tBOOH Exposure with and without SB-366791

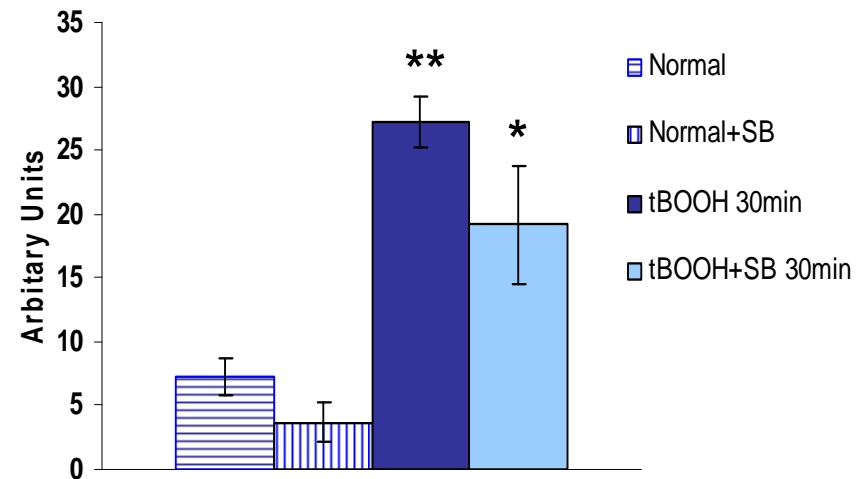

Supplement: MOESM6 [file 9612992]
